# Supplementary material for: A fluorescence-enhanced inorganic probe to detect the peptide and capsid protein of human papillomavirus in vitro
Source: Royal Society of Chemistry journal article supplement (doi:10.1039/c6ra00105j), 2016-01-01
Supplement: c6ra00105j1.pdf [file c6ra00105j1.pdf]

## A Fluorescence Enhanced Inorganic Probe to Detect the Peptide and Capsid Protein of Human Papillomavirus *in Vitro*

Teng Zhang, Ding-Yi Fu, Yuqing Wu\*, Yizhan Wang, Lixin Wu\*

State Key Laboratory of Supramolecular Structure and Materials, Jilin University,  
Changchun 130012, China.

(ESI)

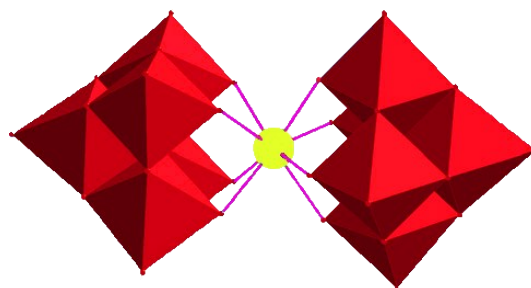

**Fig. S1** The structure of EuW10 represent by coordination polyhedral. Red polyhedron represents  $\text{WO}_6$  and the yellow ball represents Eu atom.

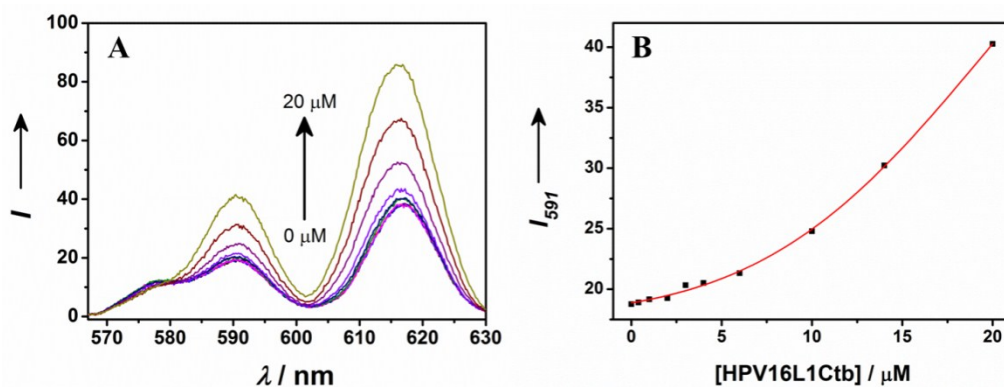

**Fig. S2** The (A) fluorescence spectra and (B) corresponding intensity at 591 nm of EuW10 (30.0  $\mu\text{M}$ ) in buffer A solution upon gradual addition of HPV16L1Ctb, where a limit of detection (LOD) at 1.9  $\mu\text{M}$  was obtained for 16L1Ctb.

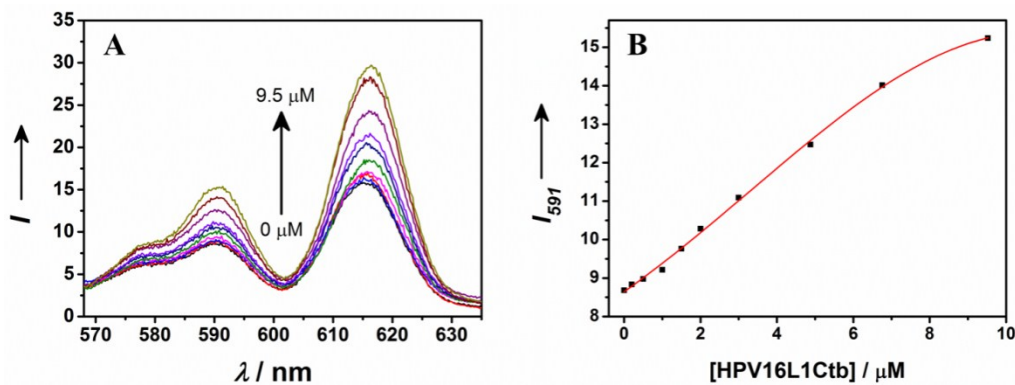

**Fig. S3** The (A) fluorescence spectra and (B) corresponding intensity at 591 nm of EuW10 (10.0  $\mu\text{M}$ ) in buffer A solution upon gradual addition of HPV16L1Ctb, where a much lower limit of detection (LOD) at 0.5  $\mu\text{M}$  was obtained for 16L1Ctb.

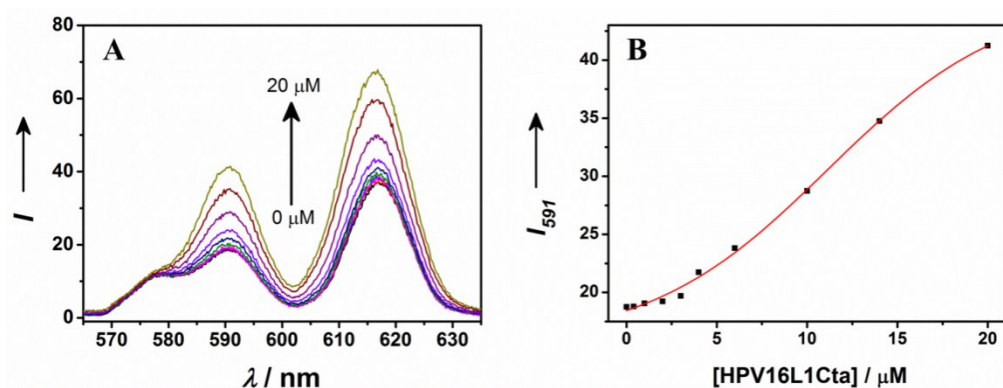

**Fig. S4** The (A) fluorescence spectra and (B) corresponding intensity at 591 nm of EuW10 (30.0  $\mu\text{M}$ ) in buffer A solution upon gradual addition of HPV16L1Cta, where a limit of detection (LOD) at 1.0  $\mu\text{M}$  was obtained for 16L1Cta.

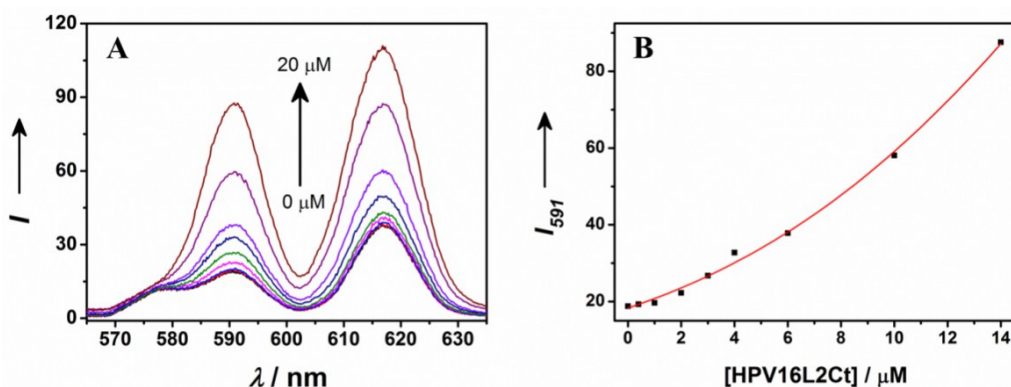

**Fig. S5** The (A) fluorescence spectra and (B) corresponding intensity at 591 nm of EuW10 (30.0  $\mu\text{M}$ ) in buffer A solution upon gradual addition of HPV16L2Ct, where a limit of detection (LOD) at 0.6  $\mu\text{M}$  was obtained for 16L2Ct.

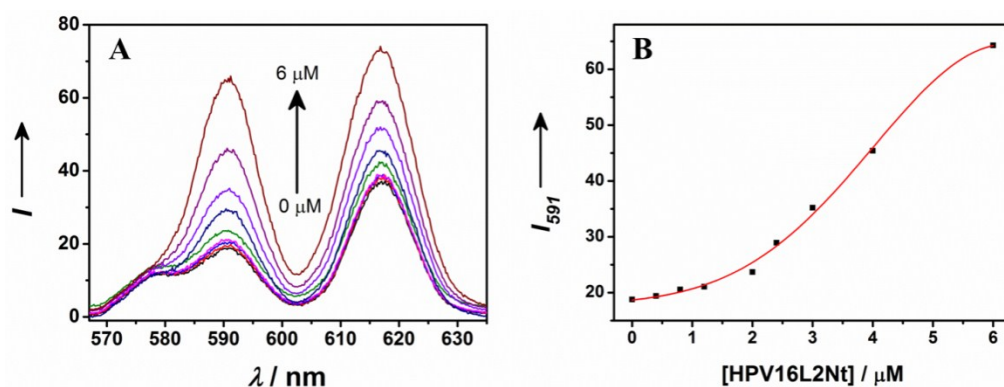

**Fig. S6** The (A) fluorescence spectra and (B) corresponding intensity at 591 nm of EuW10 (30.0  $\mu\text{M}$ ) in buffer A solution upon gradual addition of HPV16L2Nt, where a limit of detection (LOD) at 0.4  $\mu\text{M}$  was obtained for 16L2Nt.

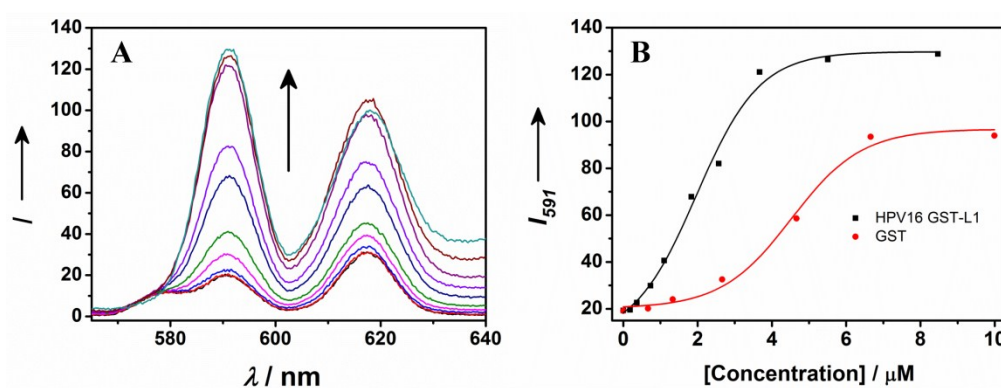

**Fig. S7** The fluorescence spectra of EuW10 (30.0  $\mu\text{M}$ ) in buffer A solution upon the gradual addition of (A) HPV16 GST-L1, and (B) the intensity comparison of EuW10 at 591 nm upon the titration of HPV16 GST-L1 and GST, respectively.

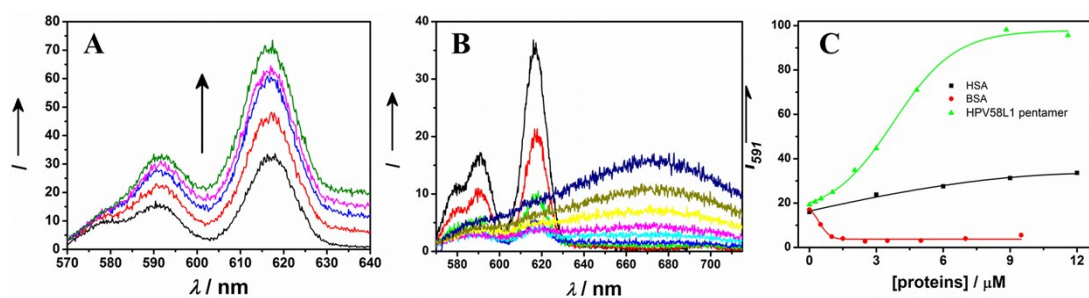

**Fig. S8** The fluorescence spectra of EuW10 (30.0  $\mu\text{M}$ ) in buffer A solution upon the gradual addition of (A) HSA, and (B) BSA; (C) the intensity comparison of EuW10 at 591 nm upon the titration of HSA, BSA and HPV58L1 pentamer, respectively.

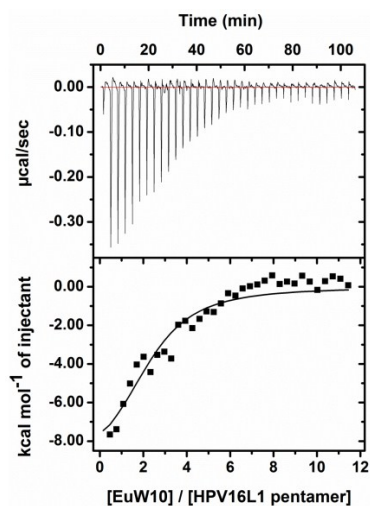

**Fig. S9** The titration isotherm for the interaction of EuW10 with HPV16L1ΔN4ΔC30: HPV16L1ΔN4ΔC30 (10 μM, in the cell) is titrated by 800 μM EuW10 (in the syringe), and the measurement is in buffer A solution at 25 °C. The integrated heat and fitted lines of the reactions are listed in the bottom pane.

**Table S1** Lifetimes and component ratios of the EuW10 (30.0 μM) before and after binding with the four peptides.

| Lifetimes<br>& Ratios Components |                    | $\tau_1/\mu\text{s}$ | $a_1$  | $\tau_2/\mu\text{s}$ | $a_2$  |
|----------------------------------|--------------------|----------------------|--------|----------------------|--------|
|                                  |                    | 30.0 μM EuW10        |        | 250                  | 100%   |
| 30.0 μM<br>EuW10                 | + 90 μM HPV16L1Cta | 339                  | 23.46% | 1860                 | 76.54% |
|                                  | + 90 μM HPV16L1Ctb | 419                  | 8.79%  | 2419                 | 91.21% |
|                                  | + 90 μM HPV16L2Ct  | 772                  | 18.16% | 4093                 | 81.84% |
|                                  | + 90 μM HPV16L2Nt  | 818                  | 15.11% | 4204                 | 84.89% |

**Table S2** The thermodynamic parameters for the binding of EuW10 with HPV16L1ΔN4ΔC30 in buffer A solution at 25 °C.

| POM   | Temp<br>/ °C | $n$         | $K_b / \text{M}^{-1}$           | $\Delta H /$<br>(Kcal·mol <sup>-1</sup> ) | $\Delta G /$<br>(Kcal·mol <sup>-1</sup> ) | $T\Delta S /$<br>(Kcal·mol <sup>-1</sup> ) |
|-------|--------------|-------------|---------------------------------|-------------------------------------------|-------------------------------------------|--------------------------------------------|
| EuW10 | 25           | 2.33 ± 0.33 | (1.09 ± 0.45) × 10 <sup>5</sup> | -9.84 ± 1.83                              | -6.42 ± 1.83                              | -3.42                                      |
